# Supplementary material for: Geochemistry and Mineralogy of the Clay-Type Ni-Laterite Deposit of San Felipe (Camagüey, Cuba)
Source: Preprints.org preprint supplement (doi:10.20944/preprints202308.0428.v1), 2023-08-04
Supplement: Supplementary file 1 [file supplementary]

## Sheet: S1
Table S1. Major elements in wt.% of cores 83 and 84 (LOD = below limit of detection).
Core	Depth (m)	SiO2	Al2O3	CaO	K2O	MgO	Na2O	MnO	Fe2O3	CoO	NiO	TiO2	Cr2O3	LOI	total
83	1	8.84	13	0.03	0.04	0.21	LOD	0.417	63.25	0.046	0.442	0.48	5639	11.29	103.7
83	5	41.79	7.42	0.11	0.03	4.16	LOD	0.21	34.4	0.043	0.919	0.2	1826	9.54	100.6
83	7	36.3	4.43	0.13	LOD	2.56	LOD	0.136	44.46	0.022	1.108	0.06	2009	8.66	99.88
83	10	31.34	4.7	0.11	LOD	2.83	LOD	0.109	47.83	0.014	0.946	0.04	2104	8.79	98.81
83	15	84.21	1.09	0.03	LOD	1.34	LOD	0.05	8.95	0.011	0.368	0.06	0.369	2.34	98.82
83	16	48.88	3.16	0.13	LOD	3.9	LOD	0.324	33.57	0.037	0.994	0.03	1316	7.1	99.44
83	22.6	46.74	3.19	0.15	LOD	7.13	LOD	0.177	30.61	0.031	1.126	0.06	1853	7.51	98.58
83	23.7	48.82	3.09	0.09	LOD	7.02	LOD	0.176	31.43	0.035	1.101	0.02	1349	6.37	99.5
83	24.8	45.35	2.73	0.08	LOD	15.66	LOD	0.425	24.14	0.038	0.829	0.03	1188	8.58	99.05
84	1	32.15	7.73	0.2	0.01	4.77	LOD	0.211	32.01	0.028	0.914	0.08	4.99	5.15	88.24
84	3	49.56	3.4	0.24	0.02	4.23	LOD	0.762	30.88	0.177	1275	0.03	1852	6.45	98.88
84	4	45.03	4.23	0.25	0.02	5.62	LOD	0.945	29.85	0.134	1952	0.05	1687	7.24	97.01
84	5	45.83	3.27	0.33	0.02	5.65	LOD	0.578	30.47	0.101	2464	0.06	1924	6.9	97.6
84	6	45.25	2.41	0.2	0.02	10.89	LOD	0.337	25.87	0.046	3057	0.04	1146	8	97.27
84	7	46.3	2.17	0.18	0.01	13.62	LOD	0.354	22.65	0.037	2752	0.05	0.952	8.36	97.43
84	8	47.57	2.27	0.19	0.02	11.49	LOD	0.418	24.18	0.039	2429	0.06	0.892	7.91	97.47
84	9	46.35	2.16	0.15	0.01	14.95	LOD	0.445	21.84	0.033	2347	0.03	0.709	8.81	97.83
84	10	43.97	1.51	0.12	0.01	23.23	LOD	0.216	17.56	0.027	1089	0.07	0.681	9.99	98.47
84	11	44.73	1.82	0.15	0.01	22.79	LOD	0.185	16.89	0.027	1087	0.02	0.819	9.96	98.49
84	12	44.46	1.19	0.28	LOD	29.86	LOD	0.186	11.94	0.016	0.329	0.01	0.456	11.02	99.75

## Sheet: S2
Table S2. Representative EMPA analyses (in weight percent) and structural formulae (in half-atoms per formula unit -hafu-, based on 11 oxygens) of smectite. Analyses 84-02-1, 84-02-2, 84-02-3 and 84-02-4 are from type II smectite in ferruginous saprolite (sample 84-02); 83-23-5, 83-23-6, 83-23-7 and 83-07-8 are from smectite type II in ferruginous saprolite (sample 83-23); 84-09-9 and 84-09-10 ar…
sample	84-02-1	84-02-2	84-02-3	84-02-4	83-23-5	83-23-6	83-23-7	83-23-8	84-09-9	84-09-10	84-09-11	84-09-12
SiO2	46.42	46.73	45.54	46.18	40.84	44.44	43.85	40.65	43.04	42.63	44.69	43.66
Al2O3	2.99	2.87	2.74	2.67	2.76	3.07	3.04	2.71	1.4781	1.4735	2.68	2.63
CaO	0.2687	0.2772	0.4138	0.4397	0.1578	0.1885	0.2337	0.1787	0.3159	0.3126	0.56	0.44
K2O	0.0437	0.0759	0.0622	0.0274	0.1367	0.0982	0.106	0.0947	0.0273	0.0508	0.17	0
MgO	3.8	4.08	3.61	3.68	3.89	4.46	4.39	3.98	14.96	16.88	14.73	16.2
Na2O	0.3115	0.2628	0.1232	0.148	0.1754	0.1605	0.2328	0.2294	0.1117	0.1248	0.34	0
MnO	LOD	LOD	LOD	0.0231	0.1068	0.0239	LOD	0.0466	0	0.0125	0	0
Fe2O3	20.58	21.25	21.65	21.61	28.68	22	22.33	26.96	14.12	13.59	15.74	14.17
NiO	1.55	1.52	1.42	1.39	1.1601	0.9399	1.0285	1.66	2.78	2.95	2.3	2.99
TiO2	0.0464	0.0693	LOD	0.0232	0.0409	0.0785	0.0186	0.0135	LOD	LOD	0	LOD
CoO	LOD	0.0235	0.0397	LOD	0.1288	0.0375	0.0299	0.082	LOD	0.021	LOD	0
Cr2O3	0.6152	0.5992	0.5843	0.6542	0.2437	0.4074	0.441	0.4517	0.0914	0.0559	2.25	2.97
Total	76.6345	77.7579	76.1833	76.8456	78.3203	75.9045	75.7096	77.0566	76.9245	78.1058	82.39	82.62
sample	84-02-1	84-02-2	84-02-3	84-02-4	83-23-5	83-23-6	83-23-7	83-23-8	84-09-9	84-09-10	84-09-11	84-09-12
Si	3.93718	3.93205	3.92131	3.92144	3.83053	3.80469	3.54751	3.57931	3.6491	3.63733	3.52648	3.46727
Al	0.298887	0.305422	0.263006	0.267213	0.311873	0.31087	0.282554	0.281231	0.147697	0.148637	0.249242	0.246158
Ca	0.0244187	0.0163483	0.0347979	0.0400057	0.0174089	0.0217261	0.0146865	0.0168592	0.028697	0.0288796	0.0473471	0.0374396
K	LOD	0.00547819	0.00622949	LOD	0.0107982	0.0117331	0.0151483	0.0106376	LOD	LOD	0.0171134	LOD
Mg	0.480479	0.58073	0.456662	0.465854	0.5731	0.567839	0.503731	0.522435	1.89084	1.90287	1.73279	1.91792
Na	0.0512251	0.0184552	0.0256408	0.0243667	0.0268228	0.0391631	0.0295401	0.039163	0.0183616	0.0184784	0.0520181	LOD
Mn	LOD	0.00522012	LOD	LOD	LOD	LOD	0.0078577	LOD	LOD	LOD	LOD	LOD
Fe	1.31354	1.27758	1.39735	1.3809	1.427	1.45799	1.87471	1.78639	0.900875	0.906605	0.934658	0.846819
Ni	0.105729	0.109551	0.102649	0.0949263	0.0651548	0.0717686	0.0810427	0.117551	0.189556	0.190762	0.145962	0.190966
Ti	LOD	LOD	LOD	LOD	0.00509039	LOD	LOD	LOD	LOD	LOD	LOD	LOD
Co	LOD	LOD	LOD	LOD	LOD	LOD	0.00897014	0.00578892	LOD	LOD	LOD	LOD
Cr	0.0412463	0.023945	0.0345575	0.0439127	0.0277584	0.0302466	0.0167333	0.0314396	0.00612559	0.00616455	0.140347	0.186444

## Sheet: S3
Table S3. Representative EMPA analyses (in weight percent) and structural formulae (in half-atoms per formula unit, based on 7 oxygens) of serpentine II from sample 84-07 (saprolite horizon). The point analyses 20, 26, 27, 28 and 30 are in Figure 7.
sample	84-07-20	84-07-26	84-07-27	84-07-28	84-07-29	84-07-30
SiO2	40.72	41.62	38.18	37.45	40.39	41.17
Al2O3	1.97	2.13	1.99	1.93	2.03	2.26
CaO	0.1222	0.1108	0.0968	0.0761	0.0746	0.0932
K2O	0.0234	0.0134	0.034	0.011	0.0378	0.0247
MgO	23.37	26.09	24.36	24.69	26.87	26.6
Na2O	0.08	0.1247	0.0072	0.043	0.0858	0.1058
MnO	0.0585	0.0298	0.0554	0.0315	0.08	0.0282
Fe2O3	8.9	9	6.57	6.7	7.67	7.64
NiO	3.4	3.27	3.13	2.64	3.33	3.58
TiO2	0.0284	0.0237	0.0143	LOD	0.0242	0.0096
CoO	0.0128	0.0121	0.0121	LOD	0.0388	LOD
Cr2O3	1.1102	0.8522	0.6608	0.7895	1.0511	1.0209
Total	79.7956	83.2768	75.1106	74.3612	81.6824	82.5324
sample	84-07-20	84-07-26	84-07-27	84-07-28	84-07-29	84-07-30
Si	2.12423	2.08074	2.10241	2.08224	2.05876	2.07391
Al	0.12112	0.125502	0.129149	0.126471	0.12195	0.134175
Ca	0.0068303	0.00593511	0.00571126	LOD	LOD	0.00503036
K	LOD	LOD	LOD	LOD	LOD	LOD
Mg	1.81746	1.94446	1.99973	2.0465	2.04178	1.99757
Na	0.0080915	0.0120872	LOD	LOD	0.00847936	0.0103333
Mn	LOD	LOD	LOD	LOD	LOD	LOD
Fe	0.349383	0.33859	0.272248	0.28033	0.294201	0.289613
Ni	0.142644	0.131475	0.138614	0.118049	0.136507	0.145035
Ti	LOD	LOD	LOD	LOD	LOD	LOD
Co	LOD	LOD	LOD	LOD	LOD	LOD
Cr	0.0457809	0.0336779	0.0287634	0.0346992	0.042351	0.0406518

## Sheet: S4
Table S4. Quantitative determination (in wt.%) of the mineral phases present in the selected samples, obtained by Rietveld refinement of XRPD. Legend: Mag = magnetite, Mgh = maghemite.
Core	Depth (m)	Smectite	Serpentine	Chlorite	Quartz	Hematite	Goethite	Mag/Mgh
83	1	24.2951	0.59988	2.96941	2.74945	29.5441	39.842	LOD
83	5	34.56	7.59	1.94	6.19	LOD	49.72	LOD
83	7	27.0435	5.97299	0.310155	12.4462	LOD	53.0665	1.16058
83	10	50.7878	0.923231	3.29152	24.0743	0.622178	18.3442	1.95685
83	16	35.38	LOD	5.09	51.93	1.45	5.4	0.72
83	22.6	81.7618	3.9796	2.61974	1.62984	0.819918	1.38986	7.79922
83	23.7	81.4493	5.93703	6.64668	0.33983	0.569715	0.489755	4.56772
83	24.8	83.28	0.3	4.28	3.04	0.91	2.2	5.99
84	1	17.25	2.26	LOD	18.18	38.55	21.65	2.11
84	2	84.35	1.57	LOD	1.57	5.25	0.26	7
84	3	75.1801	12.3549	0.220088	LOD	1.48059	0.10004	10.6643
84	4	65.037	19.2462	3.14937	LOD	0.919816	0.29994	11.3477
84	5	72.1356	12.1876	0.729854	LOD	2.42951	0.09998	12.4175
84	6	86.83	6.53	LOD	LOD	0.97	0	5.67
84	7	86.5	7.04	LOD	LOD	0.72	0.14	5.6
84	8	84.0616	8.70913	LOD	LOD	0.49995	LOD	6.67933
84	9	79.1529	12.3464	LOD	LOD	1.0888	0.0998901	7.31196
84	10	79.4121	10.5789	LOD	LOD	0.669933	3.59964	5.73943
84	11	87.3913	11.0189	LOD	LOD	LOD	0.09999	1.48985
84	12	74.04	24.55	LOD	LOD	LOD	LOD	1.41

## Sheet: S5
		Table S5. Structural formulae of Ni-smectite from various localities worldwide, ordered by Ni content in the octahedral position (hafu based on 11 oxygens).
		structural formula smectite	description and localization sample	parent rock	position sample in profile	reference
		(Ni2.14Fe0.35Mg0.12Al0.1Cr0.09Ti0.01Cu0.03) Σ=2.71( Si3.67Al0.33Fe0.04)O10(OH)2K0.05Ca0.01	Ni-saponite from Jacuba, Niquelandia (Brazil)	pyroxenite	clayey layer	[64]
		(Ni1.8Fe0.43Mg0.48) Σ=2.71( Si3.76Al0.03Fe0.20)O10(OH)2Mg0.16Ca0.01	Ni-smectite Tagaung (Myanmar)	serpentinized harzburgite	upper saprolite layer	[54]
		(Ni1.75Mg1.30Mn0.01) Σ=3.06 (Si3.76Fe0.13Al0.08Cr0.03)O10(OH)2Ca0.13Na0.01	trioctahedral Ni-smectite Loma Ortega (Dominican Republic)	harzburgite	disseminated aggregates in saprolite	[24]
		(Ni1.03Fe0.83Mg0.48Al0.09) Σ=2.43 Si4.02O10(OH)2Mg0.16	Ni-smectite Tagaung (Myanmar)	serpentinized harzburgite	lower saprolite layer	[54]
		(Mg1.82Fe0.2Ni0.48Mn0.07Al0.25Cr0.21Ti0.03) Σ=3.06 (Si3.18Al0.71)O10(OH)2K0.08Ca0.4	trioctahedral smectite from olivine (forsterite) Western Ivory Coast	serpentinized dunites and harzburgites	transition layer	[49]
		(Fe1.27Mg0.40Ni0.47Al0.01) Σ=2.15( Si4Al0.01Fe0.01)O10(OH)2Mg0.14Ca0.01K0.03	Fe-smectite after olivine Tagaung (Myanmar)	serpentinized harzburgite	upper saprolite layer	[54]
		(Mg1.90 Fe0.90Ni0.19) Σ=2.99 (Si3.64Al0.15)O10(OH)2Ca0.03Na0.02	trioctahedral smectite San Felipe (Camagüey, Cuba)	serpentinized peridotites	saprolite	this work
		(Fe1.02Mg0.19Ni0.17Al0.51Cr0.12) Σ=2.01 (Si3.89Al0.11)O10(OH)2Ca0.22	dioctahedral smectite Murrin Murrin (Western Australia)	serpentinized peridotites	fissure Ca-smectite in smectite zone	[51]
		(Fe1.30Mg0.58Ni0.12Al0.08Cr0.05) Σ=2.13 (Si3.79Al0.21)O10(OH)2Ca0.26	dioctahedral smectite Murrin Murrin (Western Australia)	serpentinized peridotites	plasma Ca-esmectite in smectite zone	[51]
		(Mg0.82 Fe0.82Al0.5Ni0.12) Σ=2.26 (Si3.85Al0.15)O10(OH)2Ca0.13Na0.02K0.01	trioctahedral smectite Wingellina (Western Australia)	gabro	peridotite-derived saprolite	[23]
		(Fe1.25Mg0.81Ni0.11Al0.01) Σ=2.18( Si3.96Al0.02Fe0.03)O10(OH)2Mg0.14Ca0.02K0.03	Fe-smectite after olivineTagaung (Myanmar)	serpentinized harzburgite	lower saprolite layer	[54]
		(Fe1.44Mg0.57Ni0.07) Σ=2.08 (Si3.82Al0.18)O10(OH)2Ca0.02Na0.03.	dioctahedral smectite San Felipe (Camagüey, Cuba)	serpentinized peridotites	saprolite ferruginous	this work
		(Fe1.09Mg0.89Al0.2Ni0.05Cr0.04) Σ=2.27 (Si3.98Al0.02)O10(OH)2Ca0.06Na0.02K0.01	dioctahedral smectite Wingellina (Western Australia)	gabro	peridotite-derived saprolite	[23]
		(Mg2.46Fe0.38Ni0.02) Σ=2.86( Si3.69Al0.09)O10(OH)2Ca0.02Na0.01	trioctahedral smectite San Felipe (Camagüey, Cuba)	serpentinized peridotites	weathered peridotite	[37]
		(Mg2.55Fe0.2Ni0.02Mn0.07Al0.09) Σ=2.93 (Si3.72Al0.28)O10(OH)2Mg0.08Ca0.02	trioctahedral smectite from pyroxene (enstatite) Western Ivory Coast	serpentinized dunites and harzburgites	transition layer	[49]
